# Supplementary material for: Covariation between microeukaryotes and bacteria associated with Planorbidae snails
Source: PeerJ journal article supplement (doi:10.7717/peerj.16639), 2023-12-19

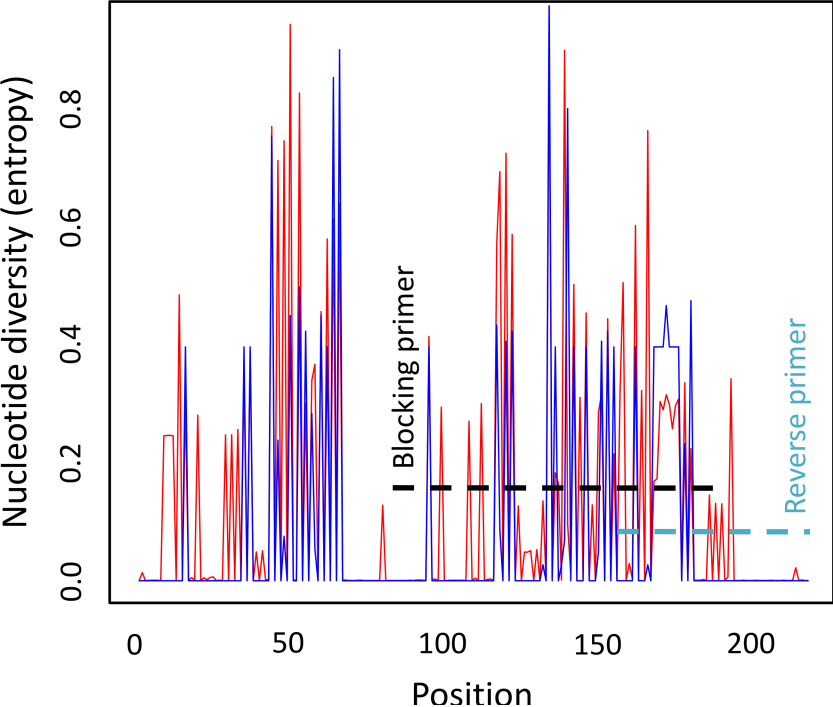

Supplement: FigS1.pdf [file FigS1.pdf]
